# Supplementary material for: Determination of the physiological and pathological roles of E2F3 in adult tissues
Source: PubMed Central journal article supplement (PMC5577339; doi:10.1038/s41598-017-09494-6), 2017-08-30
Supplement: 41598_2017_9494_MOESM1_ESM.pdf [file 41598_2017_9494_MOESM1_ESM.pdf]

# **Determination of the physiological and pathological roles of E2F3 in adult tissues**

Ivonne Gamper, Deborah L. Burkhardt, Megan J. Bywater, Daniel Garcia, Catherine H. Wilson, Peter A. Kreuzaler, Mark J. Arends, Yao-Wu Zheng, Alessandra Perfetto, Trevor D. Littlewood, and Gerard I. Evan

## **Supplementary Figures**

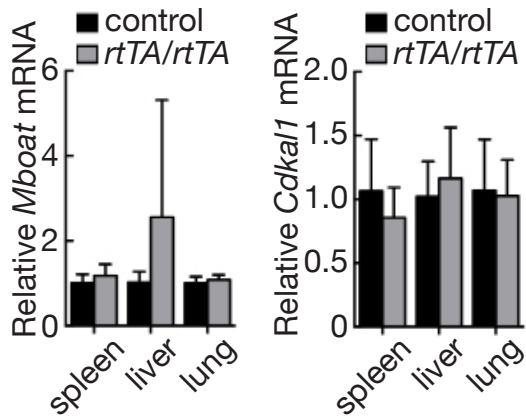

**Supplementary Fig. 1| Expression of genes proximal to *E2f3* are unaffected by rtTA induced expression of *E2f3*.**

Quantitative RT-PCR analysis of *Mboat* and *Cdkal1* in adult control ( $n=5$  (spleen,lung), 4 (liver)) and *E2f3*<sup>TRE/TRE</sup>;*Rosa26*<sup>rtTA/rtTA</sup> ( $n=3$ ) mouse tissues. Expression is normalized to *Actin* and relative to the mean of the control samples within each tissue. Error bars, s.e.m.

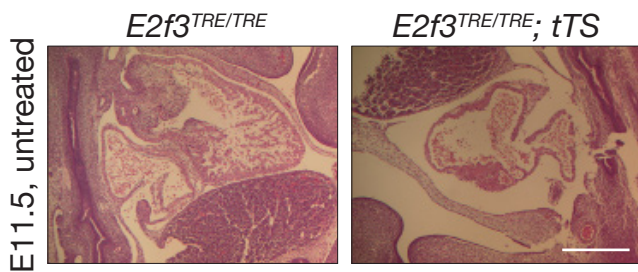

**Supplementary Fig. 2| Repression of *E2f3* in *E2f3*<sup>TRE/TRE</sup>; $\beta$ -actin-*tTS* embryos results in reduced heart trabeculation.**

Haematoxylin and eosin stained embryo hearts from *E2f3*<sup>TRE/TRE</sup>; $\beta$ -actin-*tTS* and *E2f3*<sup>TRE/TRE</sup> control 11.5 d.p.f. embryos developed in the absence of tetracycline.

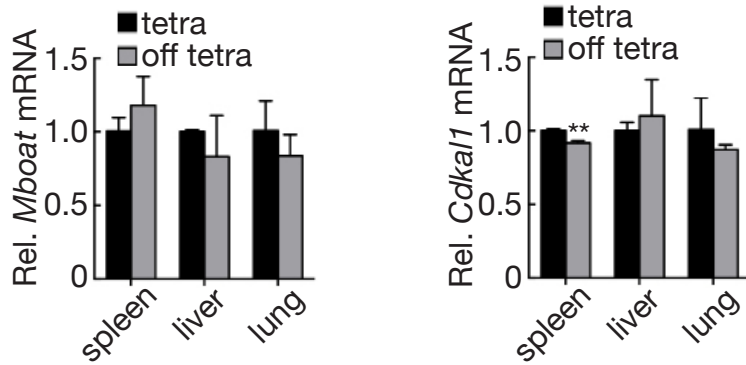

**Supplementary Fig. 3| Expression of genes proximal to *E2f3* are unaffected by tTS-dependent repression of *E2f3*.**

Quantitative RT-PCR analysis of *Mboat* and *Cdkal1* expression in *E2f3<sup>TRE/TRE</sup>;β-actin-tTS* mouse tissues in the presence ( $n=2$ ), or post removal of tetracycline for  $\geq 1$  week ( $n=3$  (spleen, lung), 4 (liver)). Expression is normalized to *Actin* and relative to the mean of the control samples within each tissue. Error bars, s.e.m. Two-tailed t-test: tetra vs off tetra;  $P=0.009^{**}$  (*Cdkal1*, spleen).

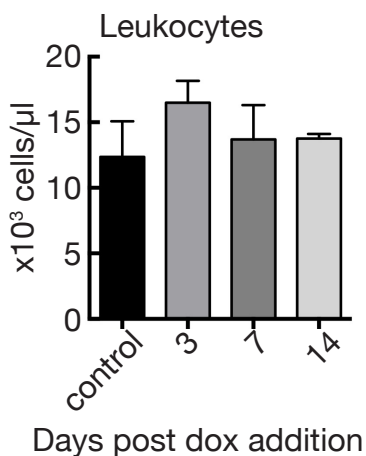

**Supplementary Fig. 4| Peripheral leukocyte numbers trend towards a transient increase following rtTA induced expression of *E2f3*.**

Leukocyte counts on peripheral blood isolated from control ( $n=2$  three days post dox,  $n=2$  seven days post dox) and *E2f3<sup>TRE/TRE</sup>;Rosa26<sup>rtTA/rtTA</sup>* ( $n=3$ , three and seven days post dox;  $n=2$ , 14 days post dox) mice at the indicated number of days post addition of Doxycycline to the drinking water. Error bars, s.e.m. Two-tailed t-test: control vs 3 days;  $P=0.071$ .

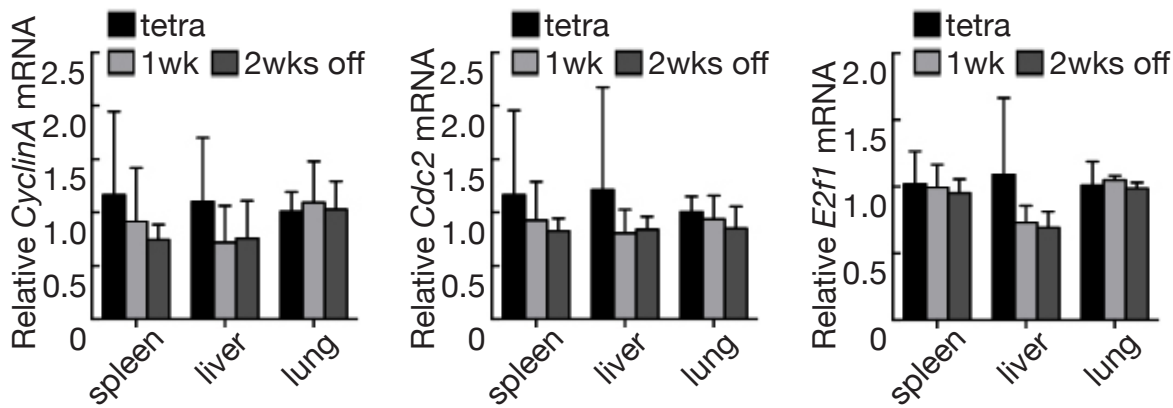

**Supplementary Fig. 5| E2F target genes are unaffected by repression of *E2f3* in adult mouse tissues.**

Quantitative RT-PCR analysis of *E2f1*, *Cdc2* and *CyclinA* expression in adult *E2f3<sup>TRE/TRE</sup>;β-actin-tTS* mouse tissues maintained on tetracycline (tetra,  $n=3$ ) and after removal from tetracycline for the times indicated (1wk,  $n=4$ ; 2wks off,  $n=3$ ). Expression is normalized to *HPRT* and relative to the mean of the control samples within each tissue. Error bars, s.e.m.

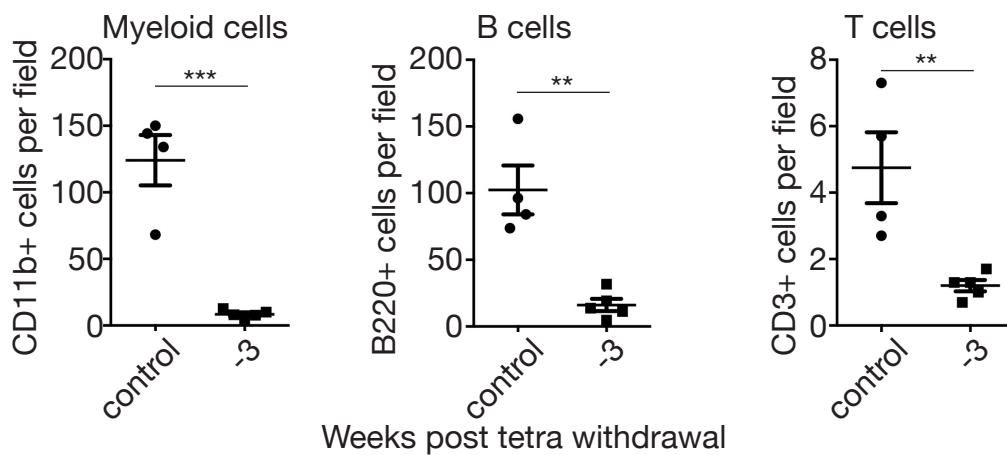

**Supplementary Fig. 6| Repression of activator *E2fs* results in attrition of leukocytes in the bone marrow.** Histogram of average numbers of CD11b (myeloid), B220 (B-cells) and CD3 (T-cells) positive cells from three fields of view in the bone marrow of *E2f1<sup>-/-</sup>;E2f2<sup>-/-</sup>;E2f3<sup>TRE/TRE</sup>* control ( $n=4$ ) and *E2f1<sup>-/-</sup>;E2f2<sup>-/-</sup>;E2f3<sup>TRE/TRE</sup>;β-actin-tTS* mice following withdrawal of 100 mg/L tetracycline for three weeks (-3,  $n=5$ ). Two-tailed t-test:  $P=0.0002^{***}$  (myeloid),  $P=0.0014^{**}$  (B cells),  $P=0.0076^{**}$  (T cells).

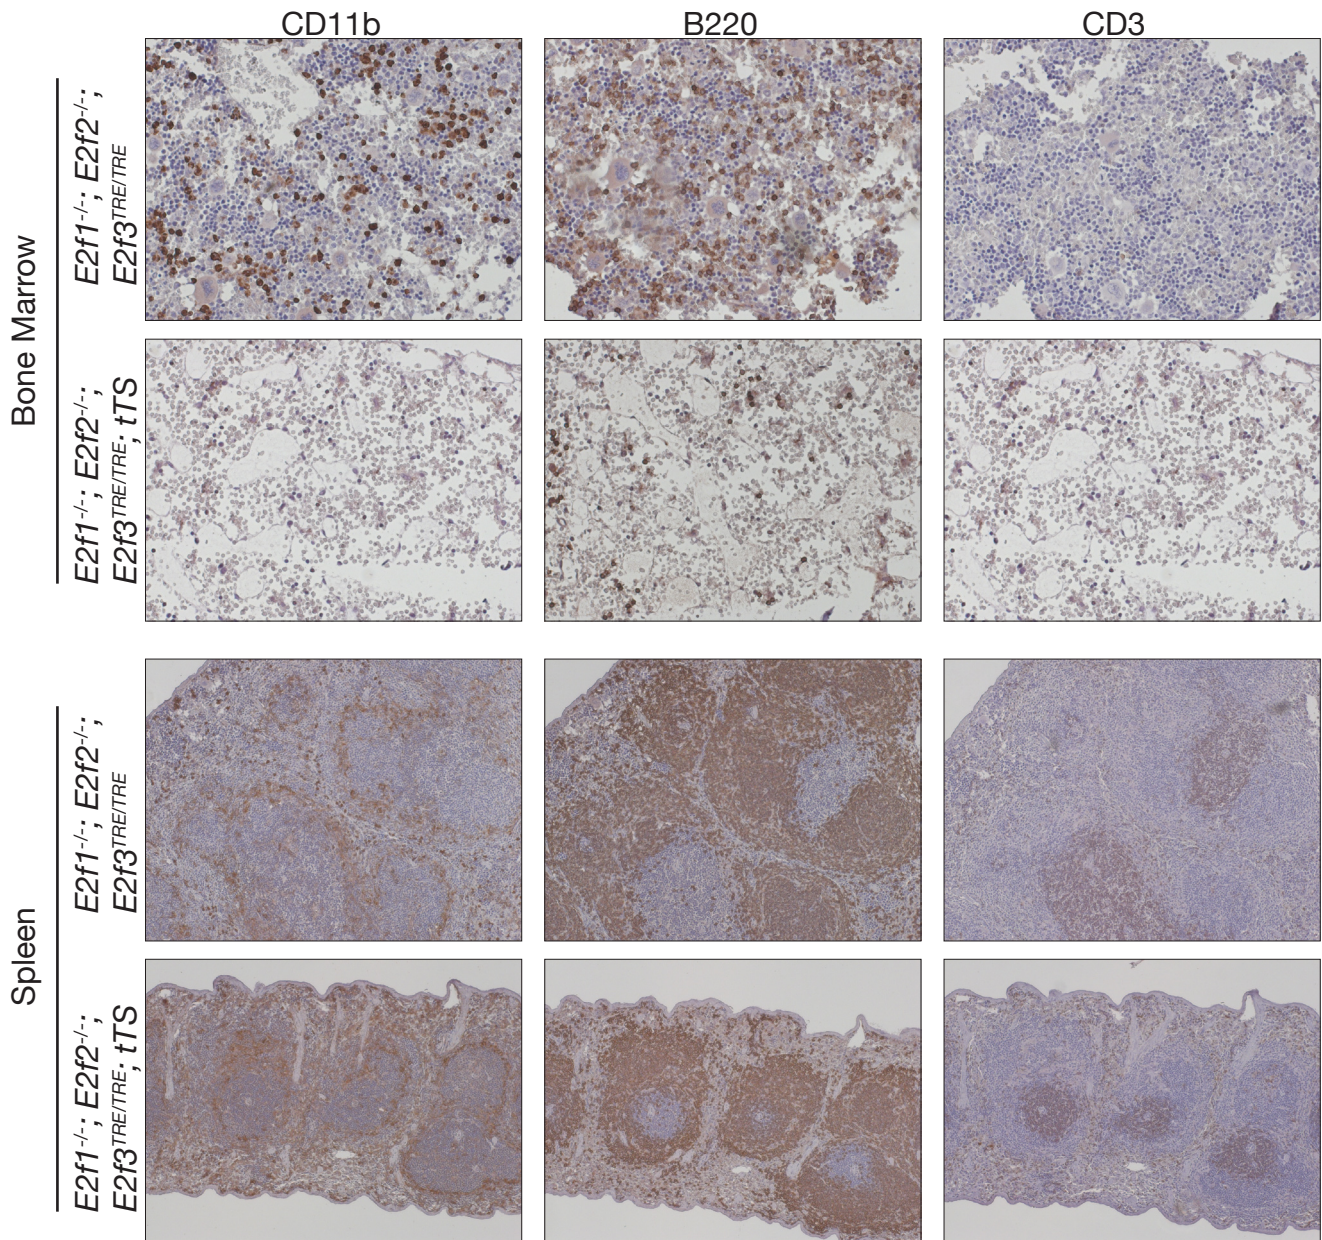

**Supplementary Fig. 7 | Repression of activator *E2fs* results in attrition of leukocytes in the bone marrow and spleen.** CD11b, B220 and CD3 stained images of the bone marrow and spleen for the identification of myeloid, B and T cells respectively in  $E2f1^{-/-}; E2f2^{-/-}; E2f3^{TRE/TRE}$  control and  $E2f1^{-/-}; E2f2^{-/-}; E2f3^{TRE/TRE}; \beta\text{-actin-tTS}$  mice 3 weeks after withdrawal of tetracycline. Representative images from  $n \geq 4$  mice.

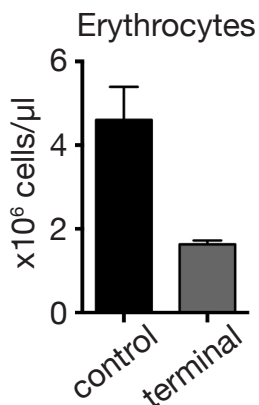

**Supplementary Fig. 8 | Repression of activator *E2fs* results in erythrocytopenia.** Histogram of total numbers of erythrocytes in  $E2f1^{-/-}; E2f2^{-/-}; E2f3^{TRE/TRE}$  control ( $n=8$ ) and  $E2f1^{-/-}; E2f2^{-/-}; E2f3^{TRE/TRE}; \beta\text{-actin-tTS}$  mice following withdrawal of 100 mg/L tetracycline until mice presented as moribund (terminal,  $n=2$ ).

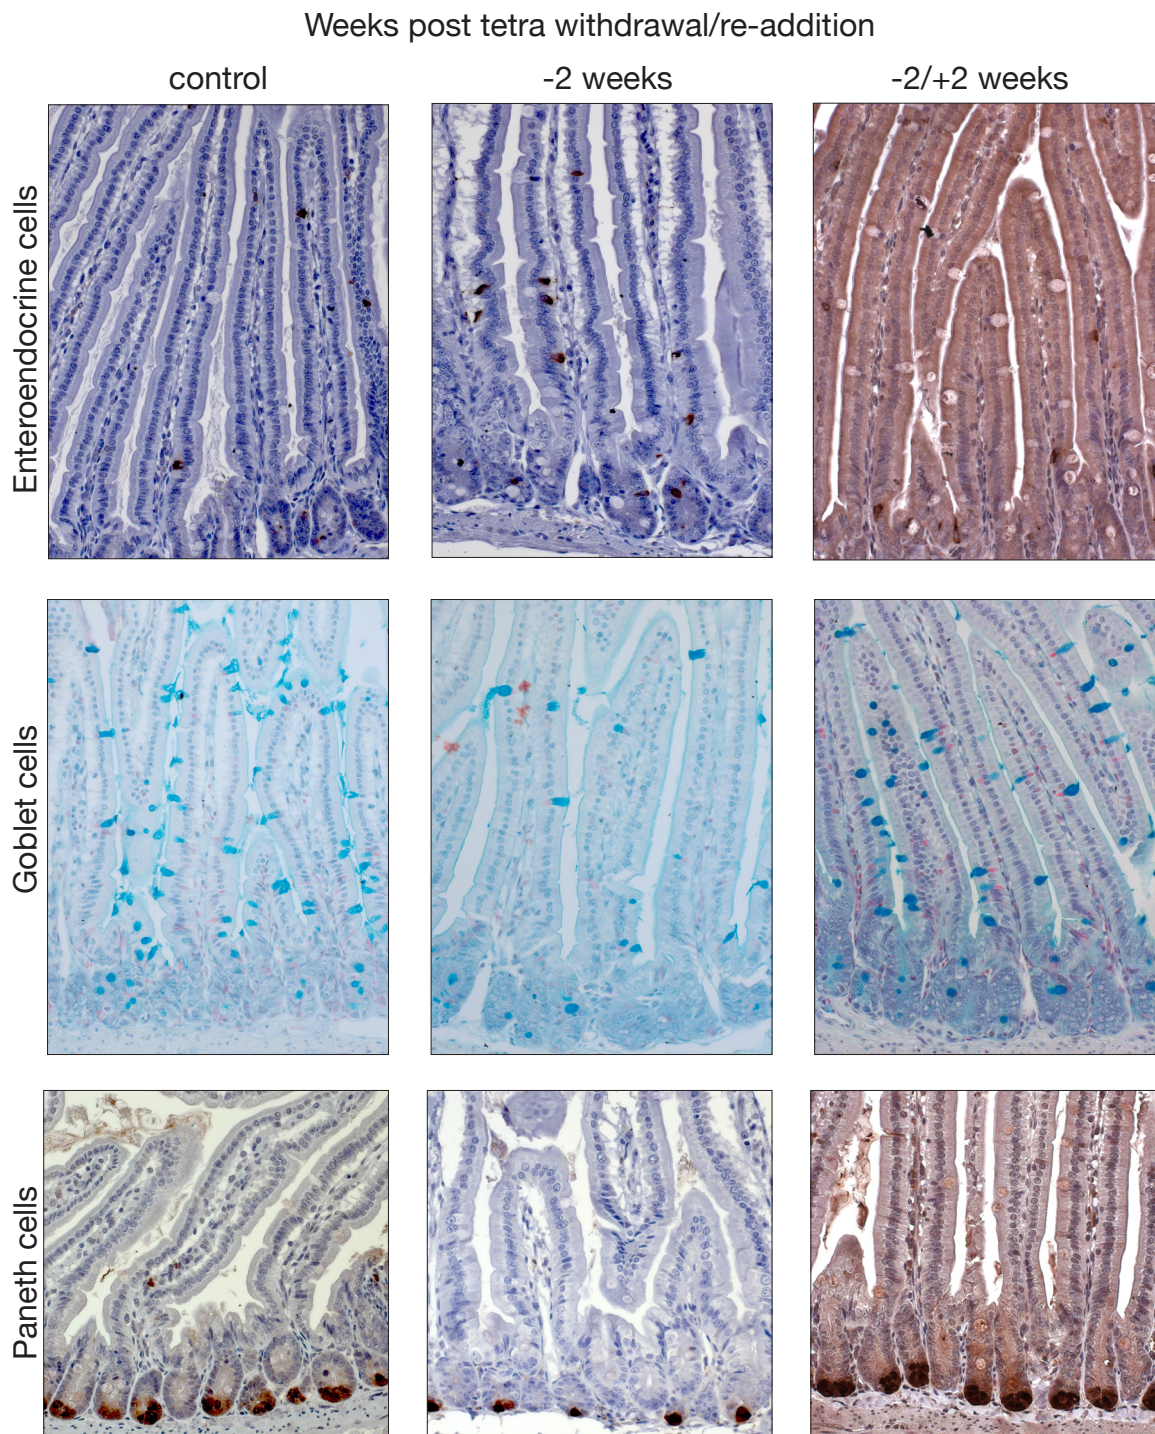

**Supplementary Fig. 9| Repression of *E2f3* in the absence of *E2f1* and *E2f2* results in altered proportions of differentiated cell types in the intestinal epithelium that can be rescued with the restoration of *E2f3* expression.**

Chromogranin A, Alcian blue and lysozyme stained images of the intestinal epithelium for the identification of Enteroendocrine, Goblet and Paneth cells respectively in  $E2f1^{-/-}; E2f2^{-/-}; E2f3^{TRE/TRE}$  control and  $E2f1^{-/-}; E2f2^{-/-}; E2f3^{TRE/TRE}; \beta\text{-actin-tTS}$  mice 2 weeks after withdrawal of tetracycline and 2 weeks post re-addition. Representative images from  $n \geq 2$  mice.

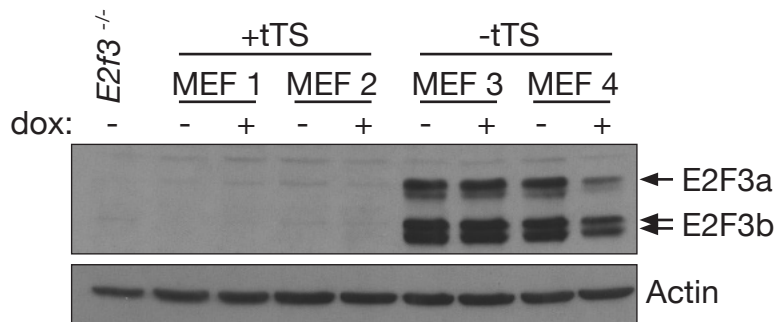

**Supplementary Fig. 10| Repression of *E2f3* is irreversible when tTS is active during embryonic development.**

Western blot analysis of E2F3 protein levels in *E2f3*<sup>TRE/TRE</sup> (-tTS) and *E2f3*<sup>TRE/TRE</sup>; *βactin-tTS* (+tTS) cultured mouse embryonic fibroblasts (MEFs), generated in the absence of doxycycline. MEFs were then grown in culture with (+) or without doxycycline (-), for at least two passages, as indicated. Replicate samples represent cultures derived from independently isolated embryos. Expression of Actin is included as a loading control.

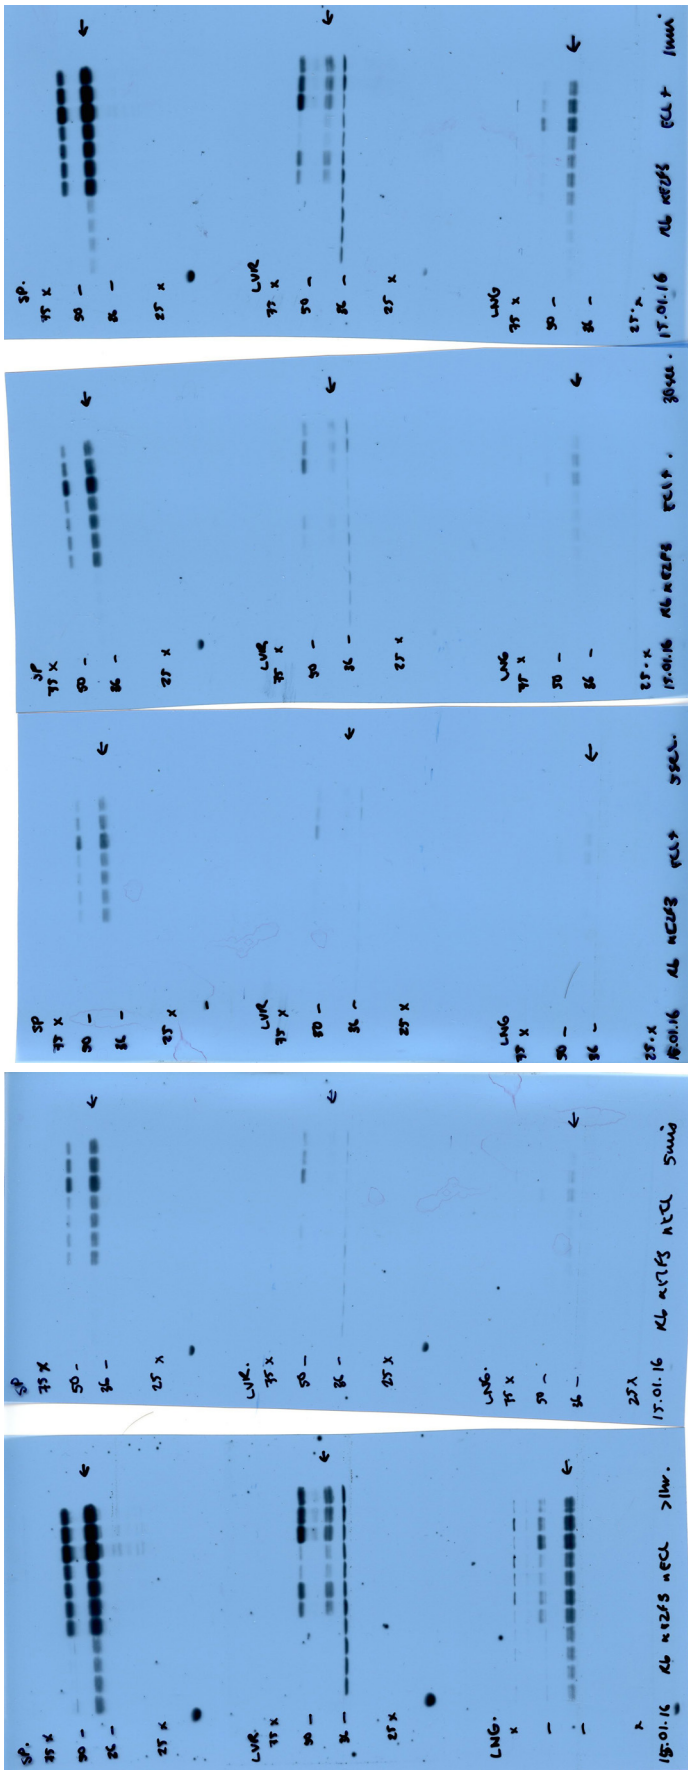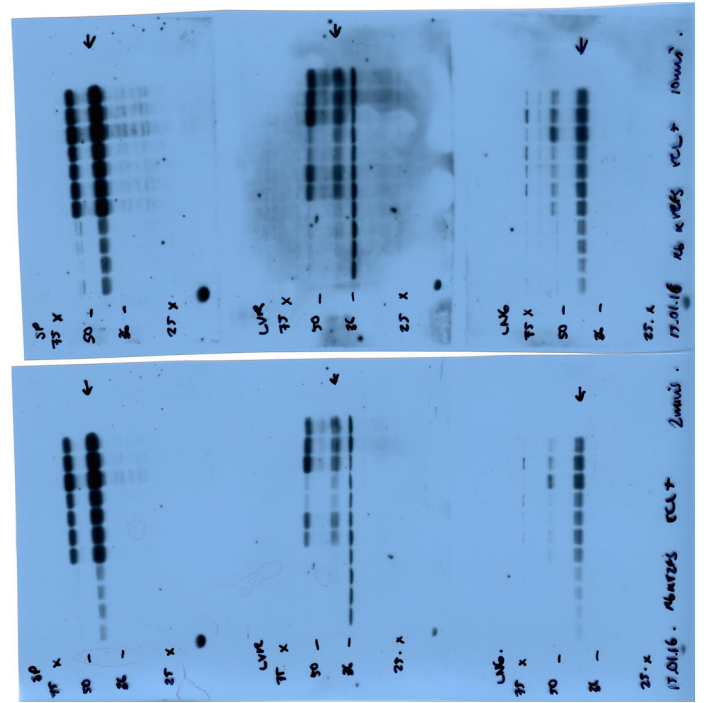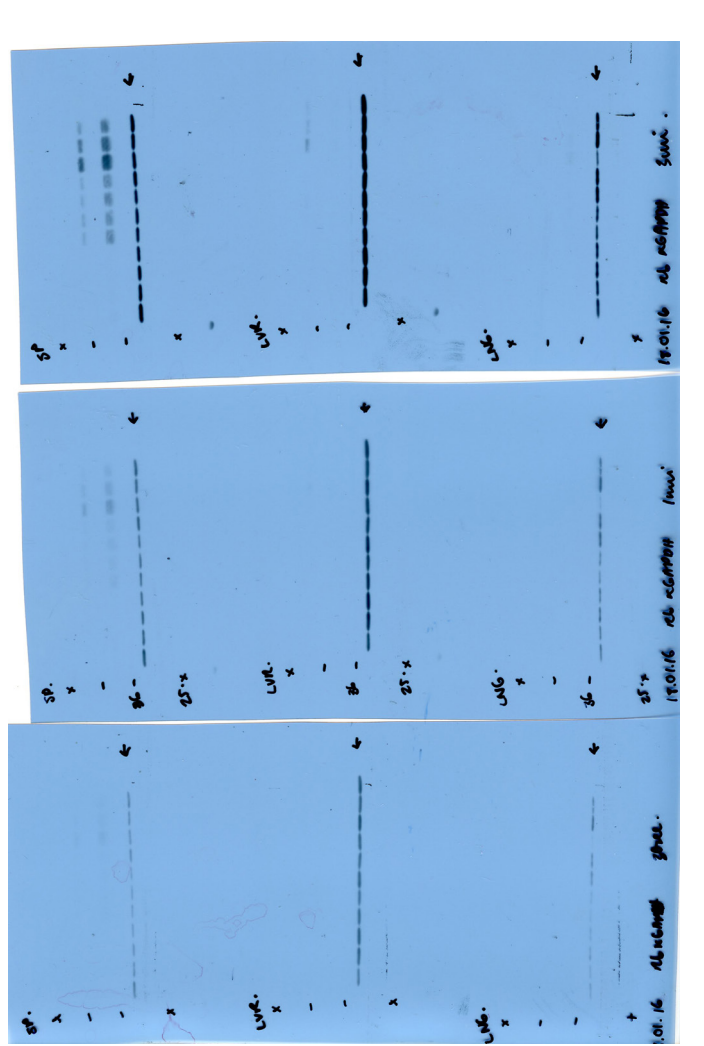

Supplementary Fig. 11| Uncropped images of blots represented in Figure 2c. Multiple exposures also included.



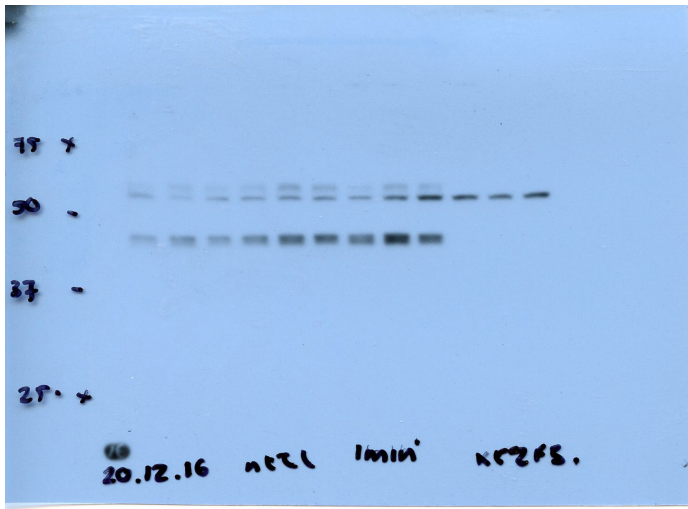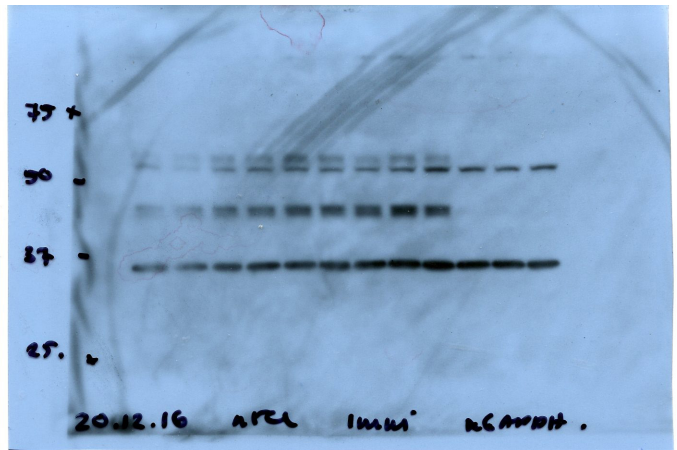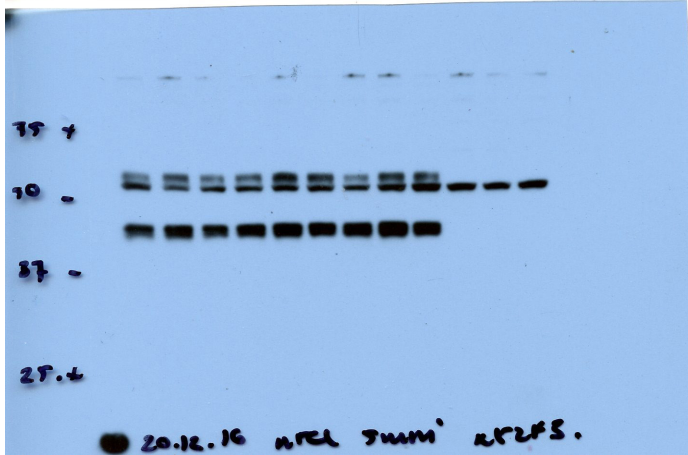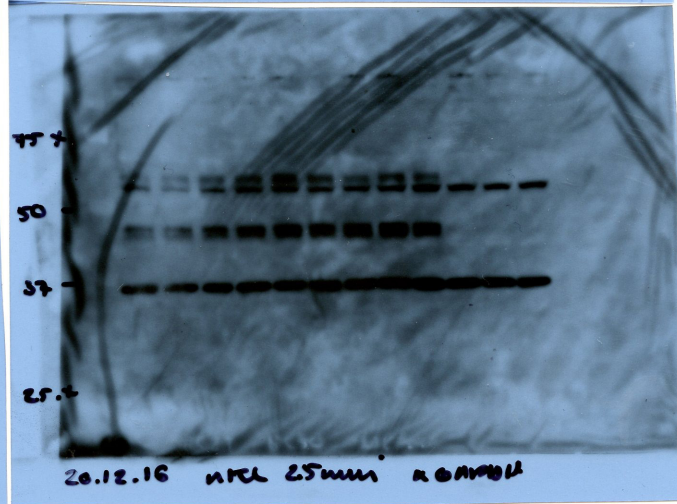

Supplementary Fig. 12| Uncropped images of blots represented in Figure 3c. Multiple exposures also included.

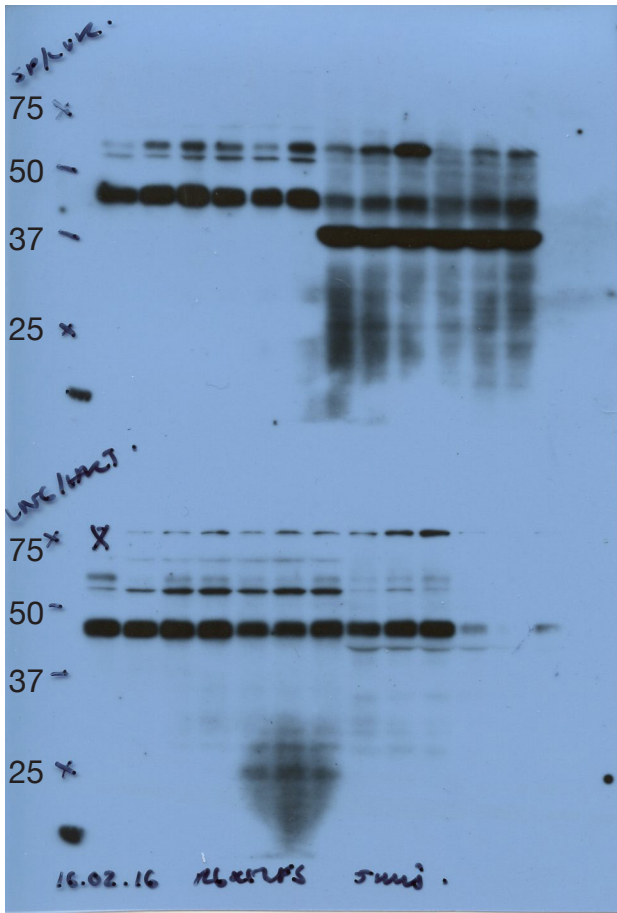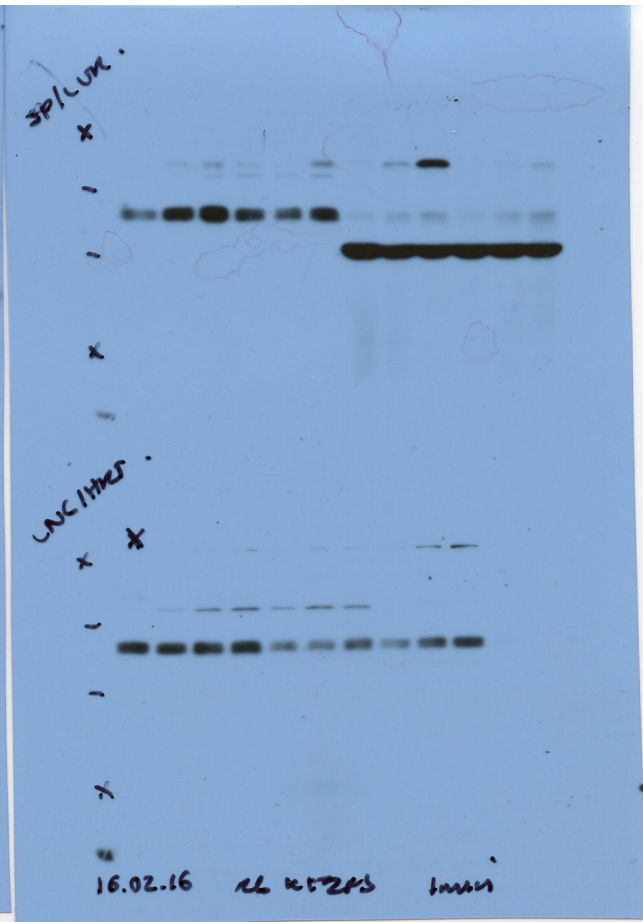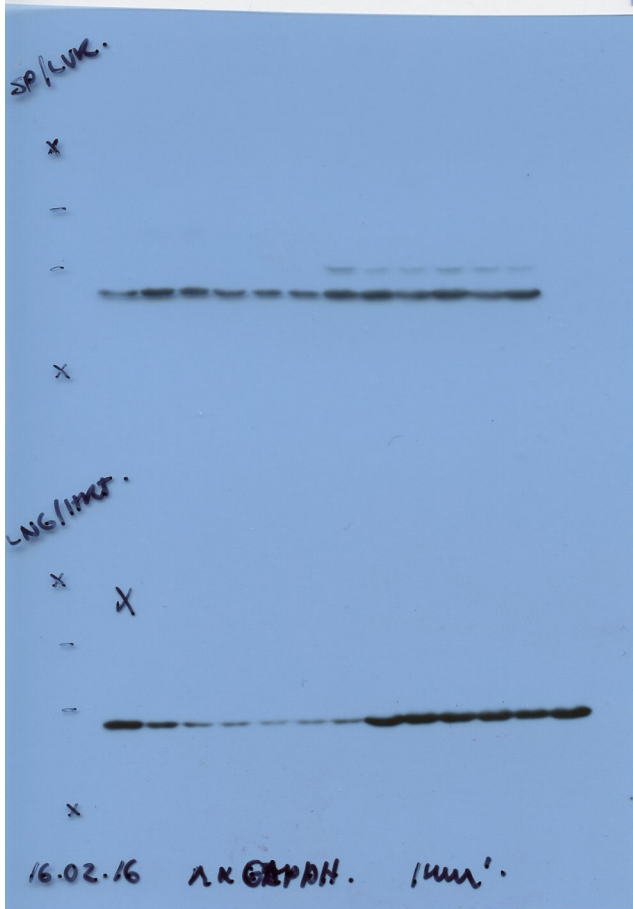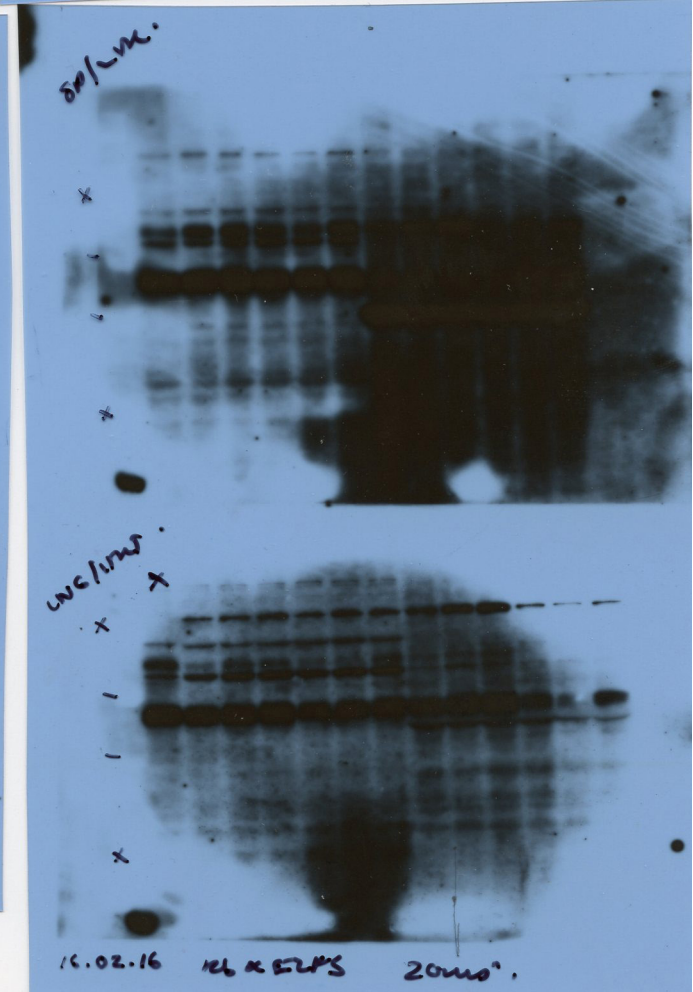

**Supplementary Fig. 13| Uncropped images of blots represented in Figure 3d.** Multiple exposures also included. "X" on the first sample on LNG blot denotes a mis-loaded sample.

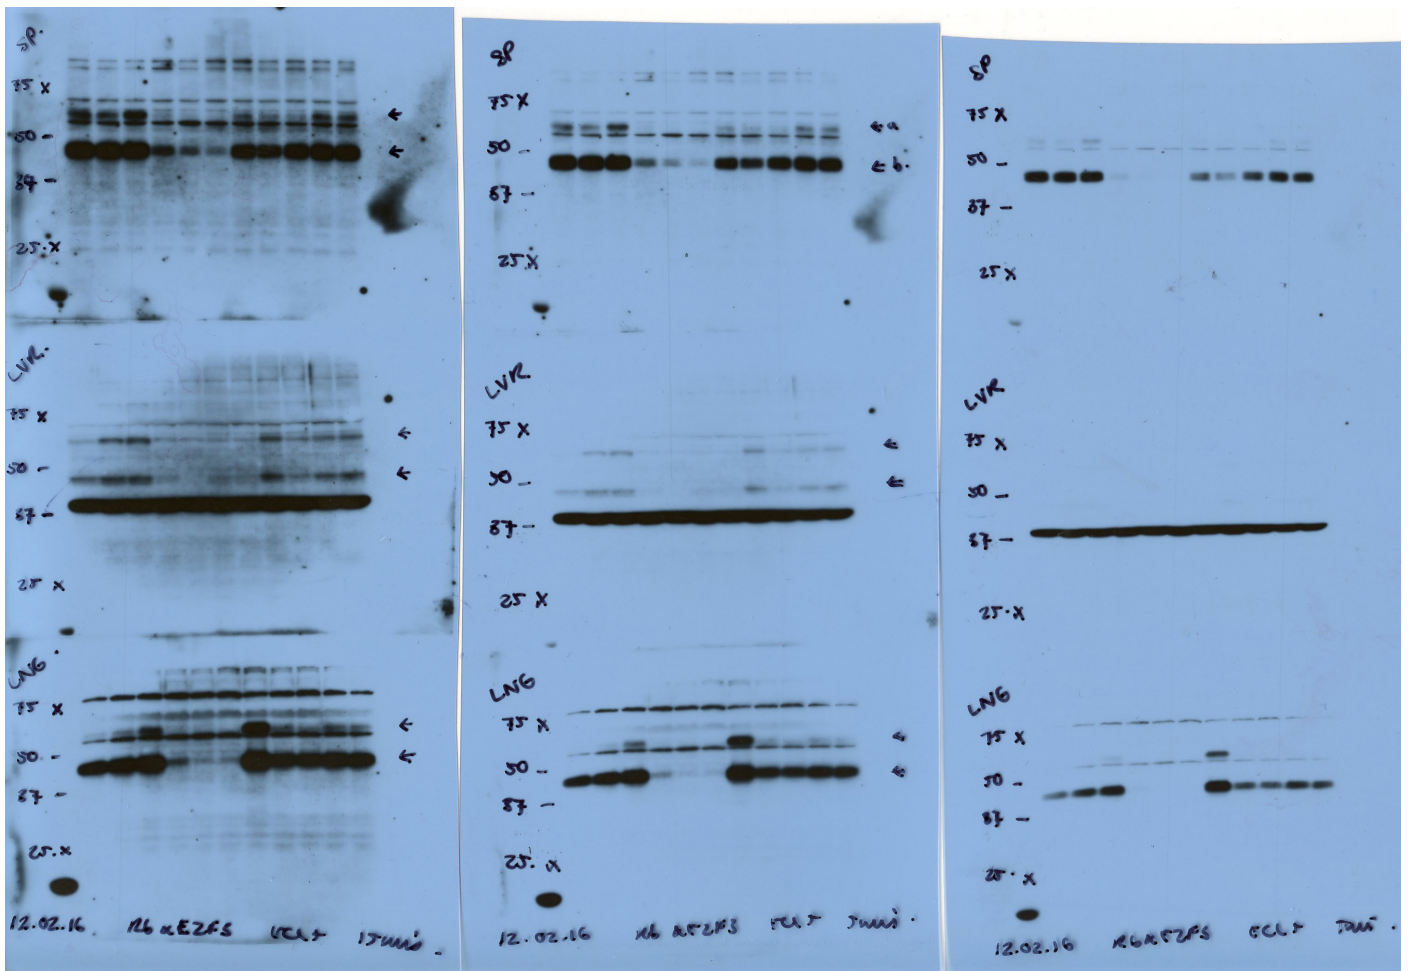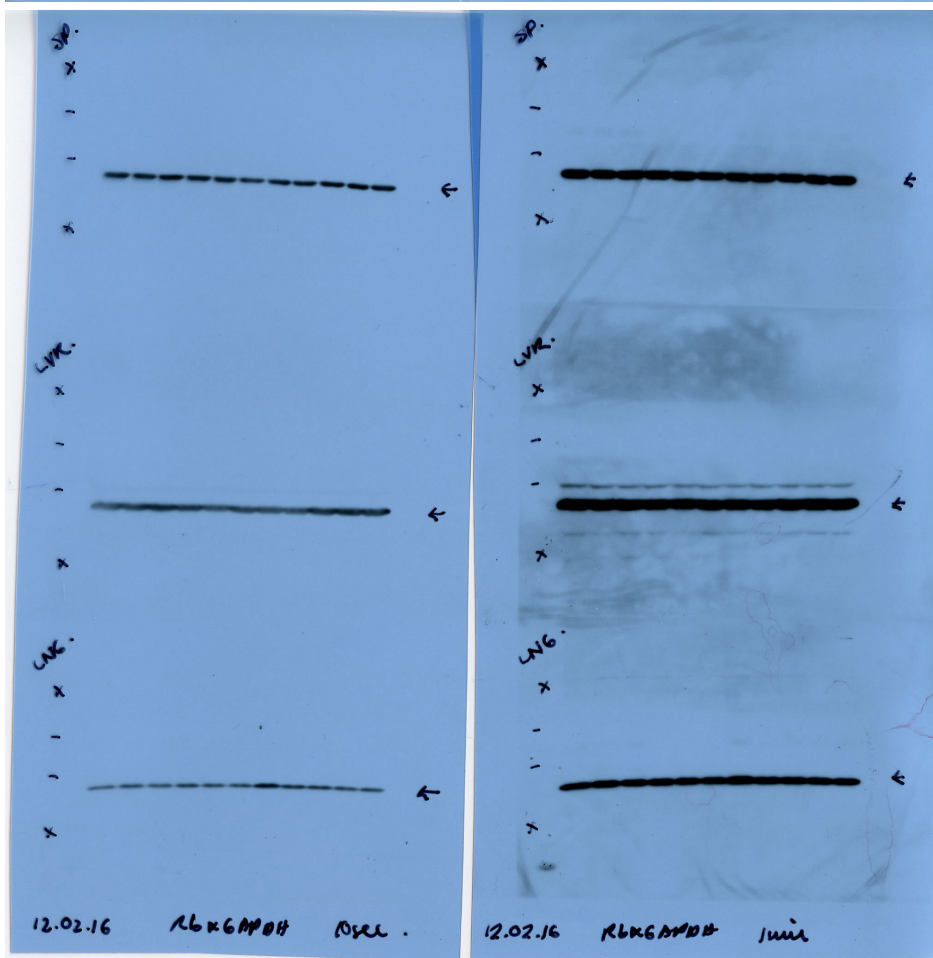

Supplementary Fig. 14| Uncropped images of blots represented in Figure 3f. Multiple exposures also included.
